1           **Classification:** Biological Sciences, Psychological and Cognitive Sciences

2

3           Title: Functional organization of motion and disparity sensitivity in human visual cortex

4           Authors: Peter J. Kohler<sup>1\*</sup>, Wesley Meredith<sup>1</sup>, Anthony M. Norcia<sup>1</sup>

5           **Affiliations:**

6           <sup>1</sup>Stanford University, Department of Psychology, Stanford, CA 94305

7

8           \*Corresponding author:

9           Peter J. Kohler

10          Jordan Hall, 450 Serra Mall, Building 420

11          Stanford University

12          Stanford, CA 94305

13          Tel: (650) 725-2433

14          Email: [pjkohler@stanford.edu](mailto:pjkohler@stanford.edu)

15          **Keywords:** motion, disparity, segmentation, suprathreshold processing

16

17

18

19

20

21

22

23

24

25

26

27

28

29

30

31 **Abstract**

32 Vision with two eyes makes perception of weak visual contrast signals easier and, due to  
33 the lateral separation of the eyes, allows for the triangulation of depth relationships.  
34 While binocular summation of contrast signals affords the observer increased sensitivity,  
35 binocular summation of spatial cues related to changes in depth is associated with  
36 decreased sensitivity to the corresponding retinal image displacements. Perceptual  
37 models of contrast and motion-in-depth sensitivity have explained this divergence in  
38 sensitivity by proposing that probabilistic neural noise limits summing and differencing  
39 operations on small signals. Because these models do not scale well for highly  
40 suprathreshold visual signals typical of the natural environment, we approached the  
41 question of how dynamic binocular image differences are coded using direct neural  
42 measurements. Here we use Steady-State Visual Evoked Potentials in human participants  
43 to show that inter-ocular differences in retinal image motion that produce elevated  
44 perceptual thresholds generate strongly suppressed evoked response amplitudes  
45 compared to motion that is matched between the two eyes. This suppression is strongly  
46 dependent on the availability of well-defined spatial references in the image and is highly  
47 immature in 5-month-old infants. Because the suppression is of equal strength for  
48 horizontal and vertical directions of motion, it is not specific to the perception of motion  
49 in depth. Relational image cues play a critical role in early to intermediate perceptual  
50 processing stages, and these results suggest that a succession of spatial and inter-ocular  
51 differencing operations condition the visual signal representation, prior to the extraction  
52 of motion-in-depth.

53

54

55

56

57

58

59

60

61

62 **Significance Statement**

63 The present work underscores the importance of relational spatial cues in both the motion  
64 and disparity domains for binocular visual coding. Relative motion and relative disparity  
65 cues not only support fine-grain displacement sensitivity but strongly influence  
66 suprathreshold responsiveness. Extraction of these cues supports a powerful binocular  
67 interaction within the motion pathway that is suppressive in nature and poorly developed  
68 in infants. This suppressive interaction is present for both horizontal and vertical  
69 directions of motion and is thus not specific to motion-in-depth, as previously believed,  
70 but is rather hypothesized to be a pre-processing step, with motion-in-depth being  
71 computed at a later or separate stage.

72

73

74

75

76

77

78

79

80

81

82

83

84

85

86

87

88

89

90

91

92

93 **body**

94 **Introduction**

95 There is robust sensitivity to both direction of motion and retinal disparity in primary and  
96 higher-order visual cortex of primates. Direction tuning is present within the classical  
97 receptive field (Hubel and Wiesel, 1968; Dubner and Zeki, 1971; Dow, 1974; Schiller et  
98 al., 1976; Maunsell and Van Essen, 1983; Mikami et al., 1986; Orban et al., 1986), but  
99 can be modified by motion in the surround. These surround effects (Bridgeman, 1972;  
100 Allman et al., 1985; Born, 2000; Cao and Schiller, 2003; Shen et al., 2007) convey  
101 sensitivity to motion-defined discontinuities and to relative motion (where two or more  
102 velocities can be compared). Psychophysically, human observers are much more sensitive  
103 to relative motion than to absolute (unreferenced) motion (Legge and Campbell, 1981;  
104 Nakayama and Tyler, 1981; McKee et al., 1990).

105 Disparity tuning is also strongly present in V1 classical receptive fields (Poggio et  
106 al., 1985; Poggio et al., 1988; Cumming and Parker, 1997). Unlike the case just described  
107 for motion, the disparity of stimuli in the non-classical surround has little or no effect on  
108 V1 disparity tuning (Cumming and Parker, 1999; Bakin et al., 2000; Cumming and  
109 Parker, 2000; Samonds et al., 2017). By contrast, in V2 and beyond, responses to  
110 disparate stimuli within the classical receptive do depend on the disparities present in the  
111 surround, to varying degree (Thomas et al., 2002; Umeda et al., 2007; Anzai et al., 2011;  
112 Shiozaki et al., 2012). As for motion, psychophysical measurements indicate that human  
113 observers are much more sensitive to relative disparity than absolute disparity  
114 (Glennerster et al., 2002; Petrov and Glennerster, 2004, 2006).

115 Motion responses in V1 and V2 and other visual areas such as MT have been  
116 studied primarily for the case of stimuli that move in the fronto-parallel plane –  
117 somewhat of a special case, since objects move in three dimensions. With natural stimuli,  
118 there are two main cues that can be decoded to signal three-dimensional motion-in-depth  
119 (MID). The visual system can read out the binocular disparity of an object relative to the  
120 fixation plane and track how this information varies over time (change of disparity over  
121 time or CDOT). Another possibility is to compare object velocity from each monocular  
122 image (inter-ocular velocity difference or IOVD). Both cues provide partial, but not  
123 complete information for motion-in-depth (Lages and Heron, 2010).

124 Psychophysical work suggests that both IOVD and CDOT cues support percepts  
125 of motion in depth (Harris et al., 2008; Czuba et al., 2010; Cormack et al., 2017), but  
126 these experiments have been done in the context of scenes that do not have strong  
127 discontinuities in either motion or disparity. This approach may be limiting because of  
128 the importance of references for the precision of both motion and disparity  
129 discrimination, indicating that the visual system is highly adapted to detecting relative  
130 rather than absolute stimulus attributes.

131 Here we systematically explore the importance of clearly defined references on  
132 neural responses to motion and disparity using minimally complex scene structures  
133 comprised of regions defined by motion, disparity or both. We also take advantage of the  
134 fundamental asymmetry in retinal stimulation caused by the lateral separations of the  
135 eyes and compare stimuli with horizontally displaced motion signals that are ecologically  
136 relevant to MID, to stimuli with vertically displaced motion signals that are not. This  
137 allows us to separate neural responses specifically adapted to 3D-motion from those that  
138 support more generic image-processing functions. We find strong evidence for an effect  
139 of references on both motion and disparity responses and show that these reference-  
140 dependent responses are highly immature in 5-month-old infants. We also show strong  
141 equivalences between 3D-motion compatible and incompatible IOVD- and CDOT-based  
142 responses that logically arise before or in parallel with the perceptually relevant activity  
143 specific to 3D-motion.

144

## 145 **Results**

146 Figure 1 shows the main stimulus configurations in schematic form. In each experimental  
147 condition, apparent motion at 2 Hz was presented in alternate bands of the display, with  
148 the amplitude of the displacement spanning 0.5 to 16 arcmin in 10 equal log steps for the  
149 adults (2-32 arcmin for infants). The adjacent, non-moving bands manipulated the  
150 availability of reference cues for motion, disparity or both. The different stimulus  
151 conditions manipulated whether the motion was in-phase or anti-phase between the two  
152 eyes, the availability and nature of motion and/or disparity cues in the non-moving  
153 reference bands, or the inter-ocular correlation of the moving bands. By making these  
154 comparisons systematically, we were able to evaluate how relative motion and disparity

155 cues, inter-ocular phase and the CDOT and IOVD cues determine the properties of the  
156 displacement response function.

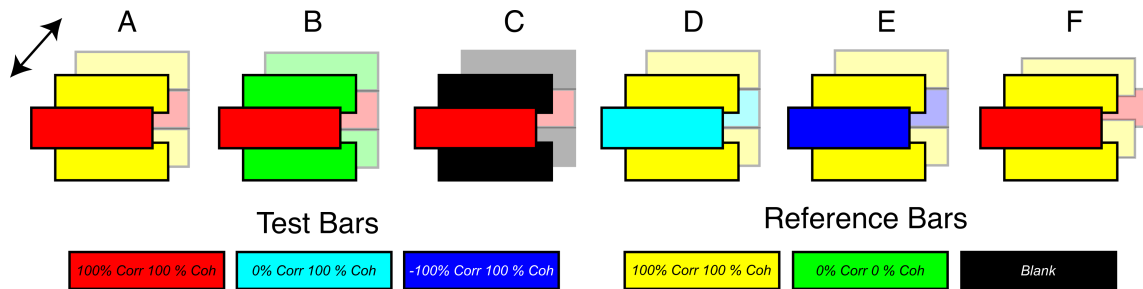

157

158 **Figure 1. Schematic illustrations of the stimulus configurations.** The displays comprised random dot  
159 kinematograms. Alternate bands (10 in the actual display) presented coherently moving dots whose motion  
160 was either in-phase between the two eyes or in anti-phase. The other set of 10 bands comprised different  
161 reference conditions. The moving bands are depicted here as a central band with the reference bands  
162 flanking it. The inter-ocular correlation in the moving bands was either 100% (red), 0% (cyan) or -100%  
163 (blue). The reference bands were either static and 100% correlated between eyes (yellow), temporally  
164 uncorrelated and inter-ocularly uncorrelated (green) or blank (black). Both horizontal and vertical  
165 directions of motion were presented. Note that in Experiment 3, the endpoints of the monocular apparent  
166 motion trajectories were manipulated such that moving bands alternated between equal and opposite  
167 values of crossed and uncrossed disparity (F) for the horizontal anti-phase condition and between right-  
168 hyper and right-hypo disparity for the vertical anti-phase condition.

169

170 **Absolute and relative motion responses.** The Steady-State Visual Evoked Potential  
171 (SSVEP) related to both absolute (unreferenced) and relative (referenced) in-phase  
172 motion occurs at even harmonics of the stimulus frequency, with the second harmonic  
173 response ( $2F/4$  Hz) being the largest (see Figure 2 for  $2F$  and Supplementary Figure 1 for  
174  $4F/8$ Hz response functions).

175 In the first condition of Experiment 1, the moving test bands are flanked by  
176 adjacent reference bands containing static dots (Figure 1A) and the SSVEP amplitude is a  
177 saturating function of horizontal displacement (Figure 2A, dark orange). This response  
178 function is well-described by the Naka-Rushton function (Naka and Rushton, 1966) and  
179 fits of this function to the data are plotted as smooth curves in Figure 2 and elsewhere. In  
180 the second condition of Experiment 1, the static reference dots were replaced with dots  
181 that were temporally incoherent (Figure 1B), making it impossible to calculate a unique  
182 relative velocity because the reference bands contain a very broad and random  
183 distribution of velocities. This manipulation strongly reduces the response amplitude for  
184 in-phase motion (Figure 2A, light orange). In the vertical direction, in-phase motion  
185 produced very similar  $2F$  responses, with similar differences between referenced and  
186 unreferenced conditions (Figure 2F).

187           The incoherent dots in the reference bands in Experiment 1 may have masked the  
188 moving dots through suppressive lateral interactions. We tested for this in Experiment 2  
189 by recording from a second group of participants using a display in which the moving  
190 bands were the same as in Experiment 1 but the reference bands were blank (Figure 1C).  
191 We also included the referenced motion conditions of Experiment 1 for a within-observer  
192 comparison. We found that the unreferenced response was now measurable, but a large  
193 difference in amplitude persisted between referenced and unreferenced in-phase motion  
194 for both horizontal (Figure 2B) and vertical conditions (Figure 2G).

195           Experiment 3 used the same conditions as Experiment 1, but the endpoints of the  
196 monocular apparent motion trajectories were manipulated (see Figure 1F). This has a  
197 strong effect on the percept and first harmonic responses produced by the anti-phase  
198 conditions (see below), but produces  $2F$  responses that are quite similar to Experiment 1,  
199 for all conditions. We again saw much weaker responses for unreferenced compared to  
200 referenced in-phase motion for both horizontal and vertical conditions (see Figure 2C, H).

201           We tested the significance of the difference between referenced and unreferenced  
202 in-phase motion with jackknifed t-tests on the Naka-Rushton function fit parameters (see  
203 Supplementary Figure 2 for a summary of the fit parameters and Table S1 for results).  
204 For the horizontal conditions, the  $R_{max}$  parameter was significantly larger for referenced  
205 motion in Experiment 2, while the baseline ( $b$ ) parameter was significantly larger in  
206 Experiments 1 and 3. In addition, there was a marginally significant trend towards higher  
207 sensitivity (lower  $d_{50}$ ) for the referenced condition in Experiment 2 ( $p = 0.058$ ). For the  
208 vertical conditions, the  $R_{max}$  parameter was significantly larger for Experiments 1 and 3,  
209 and there was a similar trend in Experiment 2 ( $p = 0.053$ ), while the baseline parameter  
210 was significant in Experiment 3 and marginally significant in Experiment 1 ( $p = 0.052$ ).  
211 The larger  $R_{max}$  and baseline parameters, and in one case lower  $d_{50}$ , for the referenced  
212 compared to the unreferenced conditions (see Table S1), demonstrate that our paradigm  
213 is sensitive to relative-motion-specific responses.

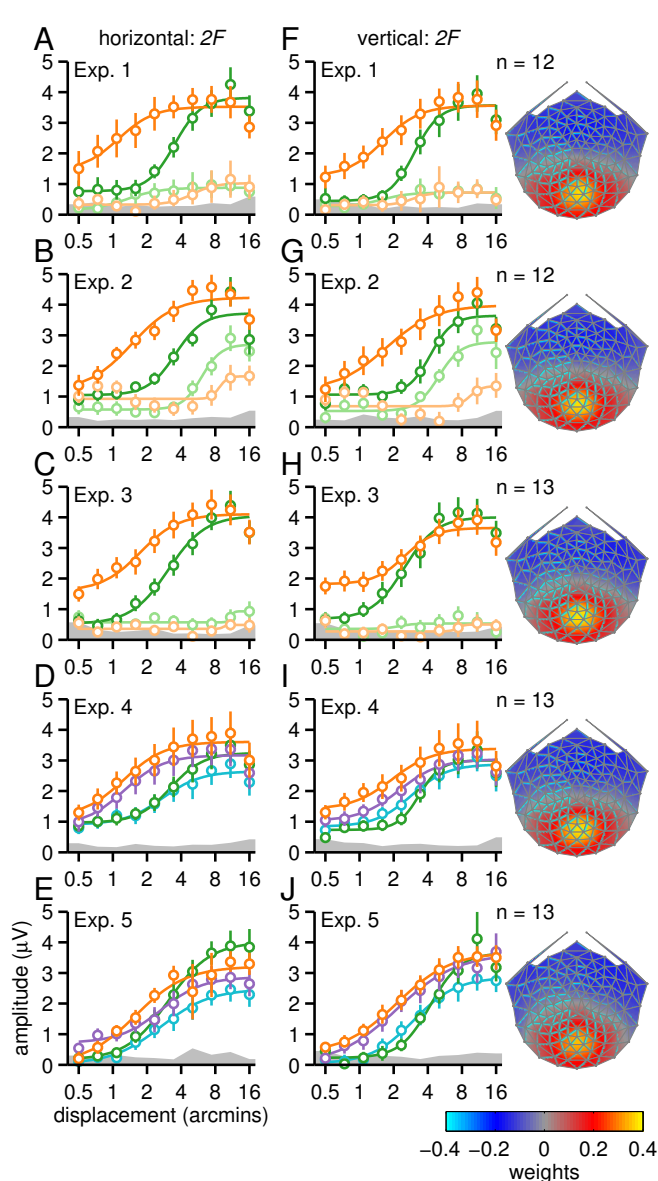

214 **Figure 2. Second-harmonic**  
 215 **response functions.** Panels A-E  
 216 depict displacement response  
 217 functions for the horizontal direction  
 218 of motion and panels F-J the vertical  
 219 direction of motion. Referenced and  
 220 unreferenced in-phase motion are  
 221 shown in dark and light orange,  
 222 while anti-phase motion is shown in  
 223 dark and light green. Note that for  
 224 Experiments 4 and 5, unreferenced  
 225 conditions were replaced with  
 226 uncorrelated and anti-correlated  
 227 motion, shown in purple for in-phase  
 228 and light blue for anti-phase.  
 229 Smooth curves are Naka-Rushton  
 230 function fits to the data (average fit  
 231 parameters are shown in  
 232 Supplementary Figure 2). The gray  
 233 bands at the bottom of the plots  
 234 indicate the background EEG noise  
 235 level, with the top of the band  
 236 indicating the average noise level  
 237 across two neighboring side-bands,  
 238 averaged across conditions. Error  
 239 bars plot  $\pm 1$  standard error of the  
 240 mean (SEM). Data are from the first  
 241 reliable component from an RC  
 242 analysis run on 2F data from all  
 243 conditions, separately for each  
 244 experiment. Rightmost column shows  
 245 the scalp topography of this  
 246 component, which is centered over  
 247 early visual cortex. Topographies  
 248 were derived separately for each  
 249 experiment, but are quite similar.  
 250 See text for additional details.  
 251

252

253 **Sensitivity to inter-ocular phase.** By making the inter-ocular phase the only difference  
 254 between conditions, we can focus the comparison of responses on specifically binocular  
 255 mechanisms. Anti-phase horizontal motion in the two eyes creates IOVD and CDOT cues  
 256 that are not present in the in-phase conditions. When the motion direction is horizontal,  
 257 these cues support a percept of motion-in-depth.

258 In the presence of a static reference, anti-phase motion evoked a response that is a  
 259 saturating function of displacement. As for in-phase motion, unreferenced responses were  
 260 strongly reduced (compare dark and light green in Figure 2A, F). We again tested for



261 differences between referenced and unreferenced conditions using jackknifed  $t$ -tests on  
262 the fit parameters (see Table S2 for results). For the horizontal conditions, the reference  
263 effect manifested as larger  $R_{max}$  in Experiments 1 and 3, and as larger baselines in  
264 Experiment 2. In addition,  $d_{50}$  was lower for the referenced condition in Experiments 2  
265 and 3, but higher in Experiment 1. For the vertical conditions, the differences manifested  
266 as larger  $R_{max}$  for the referenced condition in Experiments 1 and 3, and as larger baselines  
267 in Experiment 2.

268 The response functions for the referenced anti-phase conditions were shifted  
269 rightward on the displacement axis relative to the in-phase conditions, suggesting that the  
270 visual system was less sensitive to anti-phase motion in the two eyes. We assessed the  
271 significance of the difference between the in-phase and anti-phase conditions with  
272 jackknifed  $t$ -tests on the fit parameters (see Table S3 for results). Note that the five adult  
273 experiments (1, 2, 3, 4 and 5) all had virtually identical referenced in-phase and anti-  
274 phase conditions, so we compared the fit parameters for all of them. The  $d_{50}$  parameter  
275 was significantly lower for in-phase compared to anti-phase motion for the horizontal  
276 conditions in all five experiments, and for the vertical conditions in four out of five, with  
277 Experiment 3 as the exception. The  $R_{max}$  parameter was only significant in Experiment 3,  
278 where  $R_{max}$  was smaller for in-phase than anti-phase for both horizontal and vertical  
279 conditions. The exponent ( $n$ ) parameter was smaller for in-phase than anti-phase in the  
280 vertical conditions of Experiments 1, 2 and 5 and there was a similar trend in Experiment  
281 4 ( $p = 0.065$ ). There were no significant exponent effects for the horizontal conditions,  
282 although Experiment 2 approached significance ( $p = 0.084$ ). The baseline parameter was  
283 larger for in-phase in the horizontal conditions in Experiment 3 and in the vertical  
284 conditions in Experiments 1, 3 and 4. The differences between in-phase and anti-phase  
285 responses are thus relatively stable across the referenced conditions that were repeated in  
286 multiple experiments.

287 In Experiment 2, where the static dot reference is replaced with a blank reference,  
288 the anti-phase response function is no longer shifted to the right of the in-phase response  
289 function, but is rather shifted to the left (Figure 2B, G). This manifests as a larger  $R_{max}$  for  
290 the horizontal conditions, with a trend towards significance for the vertical conditions ( $p$   
291 = 0.10; see Table S4). This result, when compared to the results of the other experiments,

292 indicates that the suppression of responses to anti-phase motion, relative to responses to  
293 in-phase motion, depends on the content of the reference region.

294

295 **Relationship to perceptual stereo-movement suppression.** We have previously  
296 observed a reduced amplitude evoked response to anti-phase compared to in-phase  
297 motion (Cottureau et al., 2014). We suggested that this effect may be related to the  
298 perceptual phenomenon known as “stereo-movement suppression” (Tyler, 1971), a  
299 reduction in displacement sensitivity under binocular viewing conditions that has been  
300 replicated numerous times and is usually attributed to the stereoscopic motion system  
301 (Tyler, 1971; Beverley and Regan, 1973; Brooks and Stone, 2006; Katz et al., 2015;  
302 Cooper et al., 2016).

303 In our measurements, referenced anti-phase responses are reduced relative to in-  
304 phase responses both for horizontal conditions, which elicit stereoscopic motion, and  
305 vertical conditions, which do not. To determine whether our displays also elicit  
306 perceptual suppression, we conducted two psychophysical motion detection experiments,  
307 using the method of ascending and descending limits. In the first, participants viewed the  
308 static reference conditions from Experiments 1 and 2. In the second, participants viewed  
309 the blank reference conditions from Experiment 2. To directly link perceptual data to the  
310 SSVEP response functions, we recorded SSVEPs during the psychophysical  
311 measurements. The SSVEP data from both psychophysical experiments were projected  
312 through the first reliable component generated by the RCA done on the  $2F$  data from  
313 Experiment 2, and averaged over ascending trials and flipped versions of the descending  
314 trials.

315 In the first psychophysical experiment, the range of displacements was decreased  
316 to 0.25 to 4 arcmin to place the start of the ascending sweep (and the end of the  
317 descending sweep) below perceptual threshold (see Figure 4). The SSVEP response  
318 functions resembled those of previous experiments. Response amplitudes were higher for  
319 in-phase than for anti-phase motion (compare dark green and orange in Figure 2 with  
320 Figure 4A, B). This manifested as lower  $d_{50}$  for in-phase compared to anti-phase (0.83 vs  
321 1.58 for horizontal, 0.83 vs 1.75 for vertical) and higher  $R_{max}$  (1.50 vs 0.60 for horizontal,  
322 1.35 vs 0.26 for vertical), although significant differences could not be obtained

323 consistently due to noisy fits of the near-baseline anti-phase responses. Psychophysical  
324 thresholds, averaged over ascending and descending sweeps, were higher for anti-phase  
325 motion by factors  $\sim 1.5$  for horizontal and 2 for vertical displacements (Figure 4C),  
326 indicating that our experimental conditions do give rise to the stereo-movement  
327 suppression phenomenon. Paired  $t$ -tests on individual participant thresholds confirmed  
328 that these differences were significant for both horizontal ( $t(11) = -4.40, p = 0.001$ ) and  
329 vertical ( $t(11) = -7.93, p < 0.0005$ ) displays.

330 The second psychophysical experiment used the same range of displacements as  
331 the main experiments, under the assumption that unreferenced thresholds would be  
332 higher. This is in fact what we observed: SSVEP thresholds across conditions, captured  
333 by the  $d_{50}$  parameter, were on average higher for the unreferenced data by a factor of  
334  $\sim 5.3$ , compared to the referenced data from the first psychophysical experiment. The  
335 SSVEPs replicated the reversal observed in the results from Experiment 2 (compare  
336 Figure 2B, G with Figure 4D, E). The  $R_{max}$  value was significantly lower for in-phase  
337 compared to anti-phase in the vertical conditions (1.38 vs 2.79;  $t(10) = -2.70, p = 0.022$ )  
338 and there was a similar trend in the horizontal conditions (1.58 vs 2.28;  $t(10) = -2.04, p =$   
339  $0.069$ ). There was also a trend towards lower  $d_{50}$  for anti-phase compared to in-phase in  
340 the vertical conditions (6.38 vs 4.58;  $t(10) = 2.04, p = 0.069$ ), but no evidence of this for  
341 the horizontal conditions (5.69 vs 5.76;  $t(10) = -0.10, p = 0.92$ ). In addition, the exponent  
342 was significantly larger for in-phase compared to anti-phase ( $t(10) = 2.52, p = 0.030$ ).  
343 The psychophysical thresholds for the unreferenced data, averaged over ascending and  
344 descending sweeps, were higher than for the referenced data by a factor of  $\sim 4$ , but led to  
345 comparable differences between in-phase and anti-phase motion. Anti-phase thresholds  
346 were higher than in-phase by factors  $\sim 1.75$  for horizontal and  $\sim 1.5$  for vertical (Figure  
347 4C), indicating that the perceptual stereo-movement suppression phenomenon persisted  
348 in the blank reference condition. Paired  $t$ -tests on individual participant thresholds  
349 confirmed that these differences were significant for both horizontal ( $t(10) = -7.03, p <$   
350  $0.0005$ ) and vertical ( $t(10) = -5.36, p < 0.0005$ ).

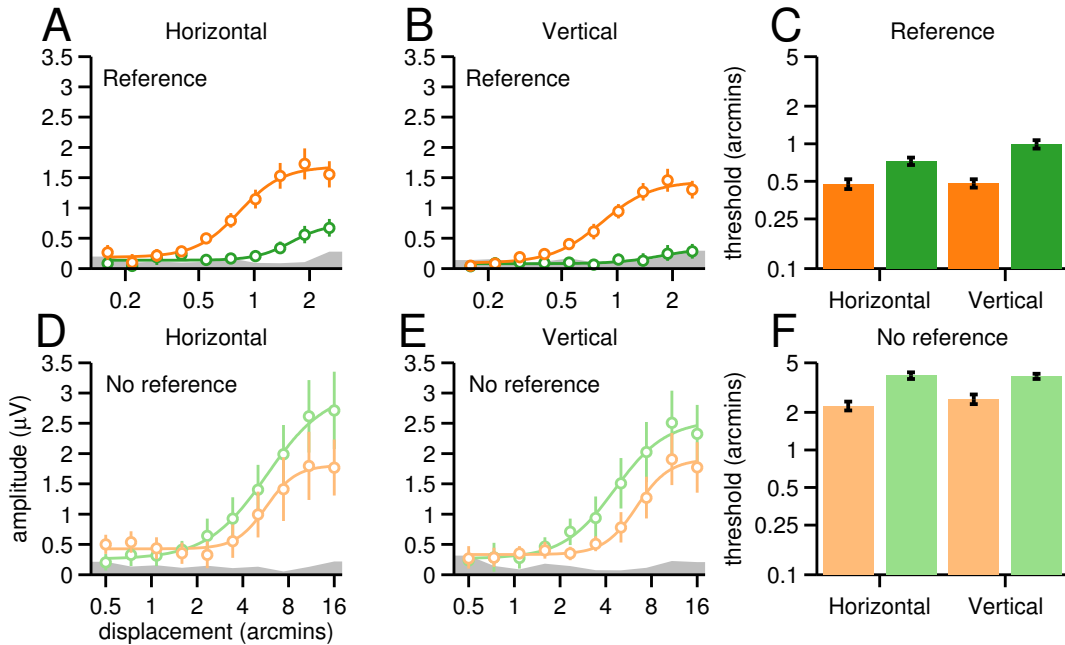

351

352 **Figure 3. SSVEP response functions and psychophysical detection thresholds.** Panels A and B show  
353 SSVEP data from horizontal and vertical direction of motion trials with a static reference ( $n = 12$ ). In-  
354 phase conditions are plotted in orange and anti-phase conditions in green. We ran both descending and  
355 ascending displacement sweeps; response functions are averages over ascending and flipped versions of  
356 descending trials. As in Figure 2, gray bands represent the average background EEG noise and smooth  
357 curves are Naka-Rushton fits to the data. Responses were weaker for anti-phase compared to in-phase for  
358 both horizontal and vertical motion. Panel C shows psychophysical thresholds for in-phase (orange) and  
359 anti-phase (green) conditions for horizontal and vertical directions of motion, plotted on a log scale, and  
360 again averaged over ascending and descending sweeps. Thresholds were higher for anti-phase compared  
361 to in-phase motion. Panels D and E show SSVEP data for blank reference conditions ( $n = 11$ ). Note that a  
362 larger range of displacements was used for the blank reference conditions and that the response functions  
363 depart from the noise level at higher displacements than in the static reference conditions. Unlike the  
364 referenced conditions, responses are weaker for in-phase compared to anti-phase. Panel F shows  
365 psychophysical thresholds for the blank reference condition. Overall psychophysical thresholds are higher  
366 by a factor of  $\sim 4$  than for the referenced conditions and thresholds are higher for anti-phase than in-phase  
367 motion for both orientations.  
368

369

370 These results of the first psychophysical experiment extend the pattern seen over  
371 the larger range of displacement amplitudes in Figure 2 to the threshold regime. For both  
372 horizontal and vertical directions of motion, SSVEPs are weaker and perceptual  
373 thresholds are higher for anti-phase compared to in-phase conditions. Because the vertical  
374 conditions do not give rise to a percept of motion-in-depth, we conclude that the  
375 suppressed anti-phase responses are not uniquely associated with percepts of motion-in-  
376 depth. In the second psychophysical experiment, the SSVEP data replicate the results of  
377 Experiment 2, with overall weaker responses for unreferenced conditions, and slightly  
stronger responses for anti-phase than in-phase, for both horizontal and vertical

378 conditions. Psychophysical thresholds are higher for unreferenced than referenced  
379 conditions, but in contrast to the SSVEP data, thresholds are higher for anti-phase  
380 conditions than in-phase. This discrepancy can perhaps be explained if participants relied  
381 on subtle reference cues in the experimental environment, that were not encoded by most  
382 of the neurons generating the population response measured by the SSVEPs.  
383 Nonetheless, the SSVEP data are consistent with the conclusion of Experiment 2: the  
384 suppression of response seen with anti-phase motion depends on the content of the  
385 reference region and is independent of whether the displays are horizontal or vertical.

386

### 387 **Binocular immaturity in infants.**

388 When we presented the horizontal referenced and unreferenced in-phase motion displays  
389 to 18 infants (~5 months old), we found that their  $2F$  responses were independent of  
390 whether the reference bands contained static dots or were blank (see Figure 4).  $t$ -tests  
391 comparing the fit parameters for the referenced and unreferenced conditions were far  
392 from significance for both in-phase and anti-phase conditions ( $p$ 's for all parameters  $>$   
393 0.2). For the referenced conditions, the in-phase stimulus had a lower  $d_{50}$  than the anti-  
394 phase stimulus ( $t(17) = 2.55, p = 0.021$ ), while in the unreferenced conditions, the  
395 baseline was lower for in-phase than anti-phase, although not quite significantly so ( $t(17)$   
396  $= -1.90, p = 0.074$ ).

397       There are several differences between the infant and adult data: First, infant  $2F$   
398 responses are not increased in the presence of a reference, in distinct contrast to the adult  
399 data (see Figure 2). Second, infant anti-phase  $2F$  responses are larger than in-phase  
400 responses, in a reversal of the adult response pattern. Note that we observed similar  
401 reversals for adults in Experiment 2 when the reference was blank (see Figure 2B, G) and  
402 in the second psychophysical experiment (see Figure 3). The infant response pattern with  
403 the full-cue, referenced display thus resembles that of the adults in the blank reference  
404 conditions. In both the in-phase and anti-phase motion conditions, the infant response  
405 shows no measureable effect of the reference. Moreover, there is no evidence for  
406 suppression of referenced anti-phase responses relative to in-phase ones, indicating  
407 infants have a specifically binocular immaturity in sensing inter-ocular phase.

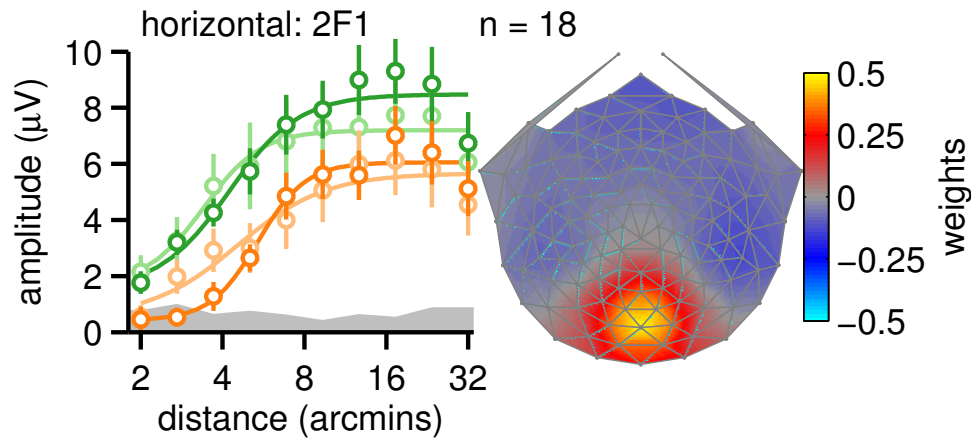

408

409 **Figure 4. Infant second-harmonic response functions.** In-phase motion response functions are shown in  
410 dark orange for the static reference condition and in light orange for the blank reference condition. Anti-  
411 phase response functions are shown in dark green for the static reference condition and in light green for  
412 the blank reference condition. Smooth curves are Naka-Rushton fits to the data. Error bars are  $\pm 1$  SEM  
413 and the gray band indicates the average EEG noise level across conditions. Unlike adults, in-phase  
414 response functions lie to the right of anti-phase functions and do not show an effect of the reference. Right  
415 panel shows the scalp topography of the first (most) reliable component which is centered over early visual  
416 cortex.

417

418 **Anti-phase suppression is a property of the IOVD system.** The perceptual stereo-  
419 movement suppression effect has been explored in the context of stimuli that have both  
420 IOVD and CDOT cues (Tyler, 1971; Brooks and Stone, 2004; Harris et al., 2008; Katz et  
421 al., 2015; Cooper et al., 2016). In the experiments just described, IOVD and CDOT are  
422 present in both horizontally and vertically oriented displays, but only the horizontal  
423 versions of the two cues can support a computation of motion-in-depth (Lages and Heron,  
424 2010). Given this asymmetry, it is not surprising that the perceptual literatures on CDOT  
425 and IOVD have focused on the horizontal case. The neural signature of anti-phase  
426 suppression we see in our data can be measured for both orientations. Because IOVD is  
427 an explicitly motion-based cue, we wanted to determine whether IOVD cues alone could  
428 elicit the suppression effects in our paradigm.

429

430 We isolated the IOVD cue using two approaches developed previously for this  
431 purpose. In Experiment 4, we used dots in the moving regions that were uncorrelated  
432 between the two eyes (Maeda et al., 1999; Shioiri et al., 2000; Nefs and Harris, 2010). In  
433 Experiment 5, we used dots that were anti-correlated between the two eyes (Rokers et al.,  
434 2008, 2009). The suppression effects were weaker and less consistent for the IOVD  
isolating conditions, but we nonetheless saw evidence that anti-phase suppression can be

435 generated by the IOVD cue alone (see Table S5). For the uncorrelated horizontal  
436 conditions (purple and blue in Figure 2D), the anti-phase suppression manifested as lower  
437  $d_{50}$ , as well as a trend towards larger  $R_{max}$  ( $p = 0.080$ ). A similar, but attenuated, pattern  
438 was seen for the uncorrelated vertical conditions (Figure 2I), where only the  $d_{50}$   
439 parameter came close to significance ( $p = 0.124$ ). For the anti-correlated horizontal  
440 conditions (Figure 2E), the anti-phase suppression manifested as higher baseline for in-  
441 phase, while for the vertical conditions there were trends towards lower  $d_{50}$  ( $p = 0.086$ )  
442 and higher  $R_{max}$  ( $p = 0.119$ ) for in-phase.

443 Weaker suppression effects may occur because the uncorrelated and anti-  
444 correlated conditions cause a different mixture of disparity- and motion-related  
445 responses. The anti-correlated cue is expected to activate disparity-tuned cells in early  
446 visual cortex, with an inverted sign (Cumming and Parker, 1997). This would not be  
447 expected for the uncorrelated case. The two conditions may thus cause a different mixture  
448 of disparity- and motion-related responses. Moreover, both IOVD isolating conditions  
449 can trigger binocular rivalry that may reduce the response magnitude in the in-phase  
450 condition that is used as the reference for the suppression effect (compare orange and  
451 purple in Figure 2D, E, I and J). Nonetheless, the overall effects and trends in the data  
452 indicate that anti-phase suppression can be generated by the IOVD cue alone.

453

454 **Candidate signal related to MID from IOVD.** The evoked response is comprised of  
455 multiple even and odd-harmonic response components and thus far we have concentrated  
456 on the 2<sup>nd</sup> harmonic component. The 2<sup>nd</sup> harmonic behavior was similar for horizontal  
457 and vertical directions of motion and it is thus not a likely source of MID signals for  
458 perception. To look further for a possible marker for evoked responses that could  
459 contribute to MID from IOVD we examined both the 2F and 4F SSVEPs for evidence of  
460 differential responses to horizontal and vertical directions of anti-phase motion under the  
461 assumption that response components that differed for perceptually relevant and  
462 irrelevant directions of motion could provide a substrate for MID from IOVD. We  
463 combined the data from the horizontal and vertical anti-phase conditions, recorded with  
464 the static reference, across Experiments 1, 2, 3 and 4, yielding a data set with 39  
465 participants (note that only one session was added to the combined data for individuals

466 that took part in several experiments). We then derived reliable components over the  
467 larger group separately for the  $2F$  and  $4F$  data, using the same RCA approach as for the  
468 individual experiments. Figure 5 shows  $2F$  (A) and  $4F$  (B) response functions for the two  
469 orientations of antiphase motion, from the first reliable component. The horizontal  
470 response functions are plotted in green, with the vertical data in red. The component  
471 topographies are plotted in (C) and (D). As expected, the  $2F$  topography is very similar to  
472 the  $2F$  topographies done separately for each experiment (compare Figure 2 and Figure  
473 5C), while the  $4F$  topography was perhaps slightly broader (Figure 5D). There was no  
474 measurable difference between responses to horizontal and vertical orientations at  $2F$ ,  
475 whereas for  $4F$  the green curve is shifted to the left, indicating that for the perceptually  
476 relevant horizontal stimulus orientation, responses rise out of the noise at lower  
477 displacements. This  $4F$  response difference manifested in lower  $d_{50}$  for horizontal  
478 compared to vertical ( $t(38) = -2.71, p = 0.010$ ). For  $2F$ , there was a trend towards a  
479 difference, but indicating higher sensitivity (lower  $d_{50}$ ) for vertical than horizontal ( $t(38)$   
480  $= 1.54, p = 0.132$ ), and thus in the opposite direction expected of a MID-related signal.  
481 All other comparisons for both harmonics were far from significance (all  $p$ 's  $> 0.2$ ).

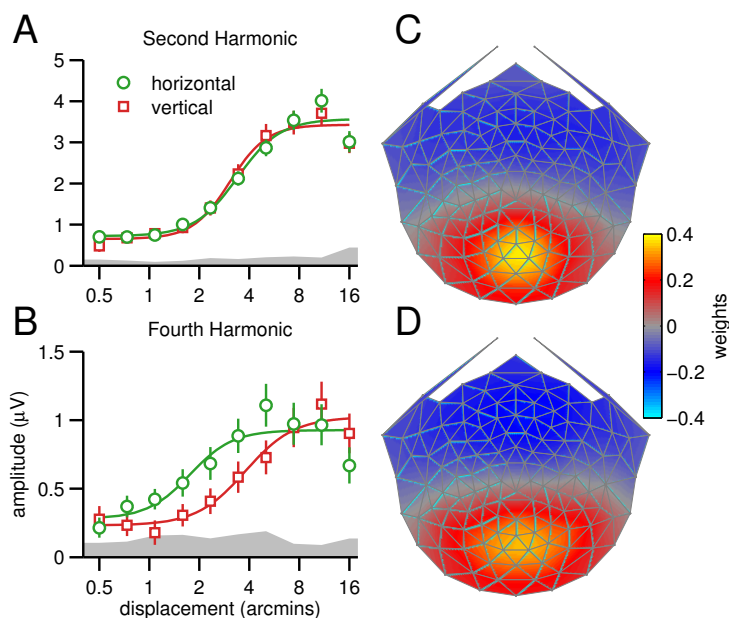

482

483 **Figure 5. Candidate MID signal from IOVD.** Response functions for horizontal (green) and vertical (red)  
484 anti-phase motion conditions, averaged across Experiments 1, 2, 3 and 4. The response functions are from  
485 the first reliable component of RCA done separately on  $2F$  (A) and  $4F$  (B) data, with the topographies  
486 shown on the right (C and D). Responses do not differ for the two directions of motion at  $2F$ , but are  
487 different at  $4F$  at the smaller displacements. An analogous analysis done on the uncorrelated and anti-  
488 correlated anti-phase conditions from Experiments 4 and 5 produced a similar pattern of results (see



489 *Supplementary Figure 3). Smooth curves are Naka-Rushton fits and gray bands are the averaged EEG*  
490 *noise level.*  
491

492 If the  $4F$  effect is in fact a substrate for MID from IOVD, we would expect it to  
493 replicate in the uncorrelated and anti-correlated IOVD-isolating conditions. To test this,  
494 we repeated the analysis with combined data from the horizontal and vertical anti-phase  
495 conditions from Experiments 4 and 5, yielding a data set with 22 participants. The first  
496 reliable components for  $2F$  and  $4F$  were similar to those produced for the larger data set  
497 (Supplementary Figure 3C and D), and the overall trend in the SSVEP response functions  
498 was similar (Supplementary Figure 3A and B), although the  $d_{50}$  parameter was not quite  
499 significantly lower for horizontal than vertical ( $t(21) = -1.52, p = 0.144$ ).

500 Overall, these results are consistent with the hypothesis that neurons generating  
501 the  $4F$  response can support a percept of motion in depth, but this would need to be tested  
502 by experiments demonstrating co-variation of the  $4F$  response with depth percepts.

503

504 **CDOT, IOVD, MID and image segmentation.** The in-phase motion conditions consist  
505 of left/right or up/down motion in the plane, and are thus phenomenologically symmetric  
506 over time. Consistent with this, the evoked response is dominated by  $2F$  and higher even  
507 harmonics. By contrast, the anti-phase condition is phenomenologically asymmetric – for  
508 horizontal motion, the observers' percept alternates between a segmented field of  
509 disparate bands and a field comprised of a flat plane (zero disparity over the whole  
510 image). This asymmetry in perceptual organization manifests in the evoked response as  
511 the presence of a response at the first harmonic ( $1F$ ) of the stimulus frequency, i.e. the  
512 rate at which the perceptual organization changes (2 Hz). The  $1F$  displacement response  
513 functions are shown in Figure 6 for the five main experiments. The data are from the first  
514 reliable component produced by RCA performed separately on the  $1F$  data, using the  
515 same approach as for  $2F$ .

516 Like the  $2F$  responses, the  $1F$  response is a saturating function of displacement,  
517 starting from the smallest displacement amplitude that depends on the presence of a local  
518 reference of static dots. In the horizontal referenced conditions of Experiments 1, 2, 4 and  
519 5 there is strong  $1F$  response for anti-phase motion, (Figure 6A, B, D, E, dark green).  
520 This response is obliterated when the reference is replaced with uncorrelated dots or

521 removed (light green), and in the in-phase conditions where there is no motion in depth  
 522 (dark and light orange). Similar dependence on a correlated zero disparity reference has  
 523 been observed with dynamic random dot displays that fully isolated the CDOT cue  
 524 (Norcia et al., 2017a).

525 We also obtained measurable  $IF$  responses for vertical conditions with a static dot  
 526 reference, but the response function is shifted to the right by a factor of  $\sim 4$  (Figure 6F, G,  
 527 I and J, dark green). Here the stimulus contains vertical relative disparity. That this  
 528 response is indeed a relative disparity response is indicated by the weak or absent  $IF$   
 529 responses in the uncorrelated and blank reference conditions (Figure 6F and G, light  
 530 green). A vertical relative disparity signal has also been found with pure CDOT dynamic  
 531 random dot stimuli (Norcia et al., 2017a). In both cases, displacement sensitivity is about  
 532 4 times better for horizontal than for vertical disparity.

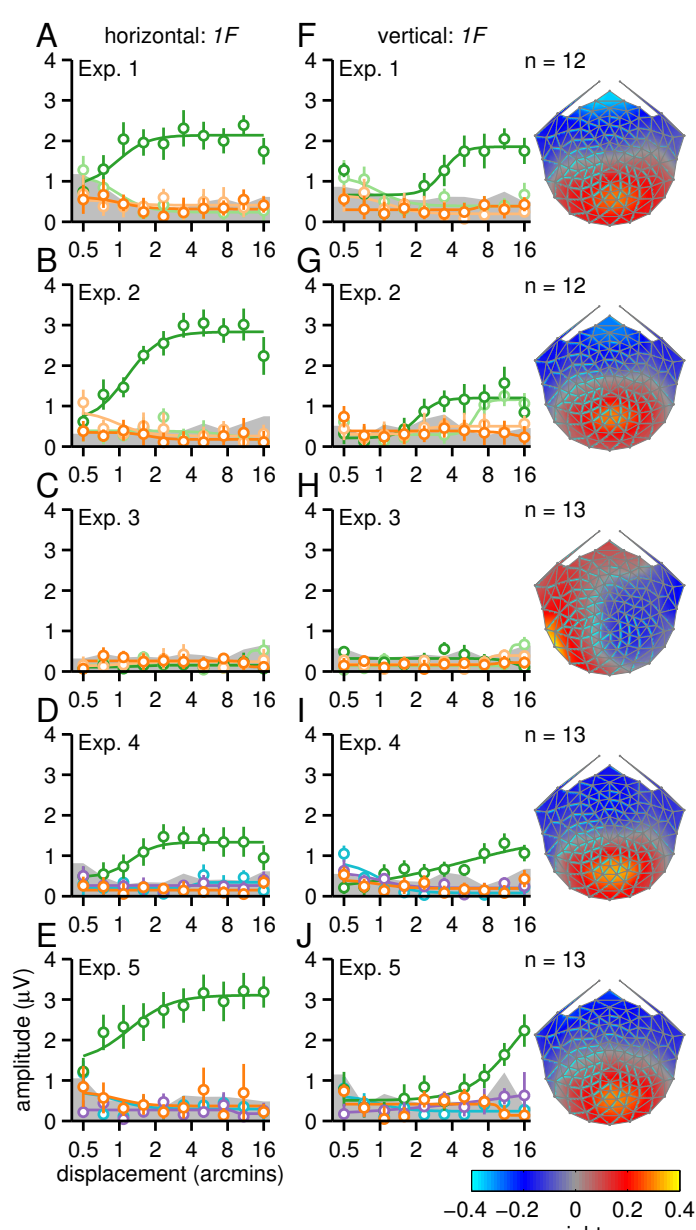

533 **Figure 6. First-harmonic**  
 534 **response functions.** Panels A-E  
 535 depict displacement response  
 536 functions for the horizontal  
 537 direction of motion and panels F-J  
 538 the vertical direction of motion.  
 539 Referenced and unreferenced in-  
 540 phase motions are shown in dark  
 541 and light orange, while anti-phase  
 542 motion is shown in dark and light  
 543 green. Note that for Experiments 4  
 544 and 5, unreferenced conditions  
 545 were replaced with uncorrelated  
 546 and anti-correlated motion, shown  
 547 in purple for in-phase and light  
 548 blue for anti-phase. Smooth  
 549 curves are Naka-Rushton  
 550 function fits to the data and gray  
 551 bands at the bottom of the plots  
 552 indicate the average background  
 553 EEG noise level. Error bars plot  $\pm 1$   
 554 standard error of the mean (SEM).  
 555 Data are from the first reliable  
 556 component from an RC analysis  
 557 run on  $IF$  data from all  
 558 conditions, separately for each  
 559 experiment. The rightmost column  
 560 shows the scalp topography of this  
 561 component, which is centered over  
 562 early visual cortex. Topographies  
 563 were derived separately for each  
 564 experiment but are quite similar,  
 565 except for Experiment 3 where

566 *there is no reliable IF response. See text for additional details.*  
567

568         The importance of references is well known for horizontal disparity (Westheimer  
569 and McKee, 1979; Glennerster and McKee, 1999; Petrov and Glennerster, 2006). The  
570 present results suggest that relative disparity is also calculated along the vertical  
571 direction, consistent with other recent findings (Norcia et al., 2017a), and provide support  
572 for a previous psychophysical finding that vertical disparities can be used for  
573 discontinuity detection (Serrano-Pedraza et al., 2010).

574         If *IF* is in fact due to the phenomenological asymmetry over time as the anti-  
575 phase display alternates between uniform and segmented percepts, the first harmonic  
576 should disappear with a stimulus configuration in which the display no longer alternates  
577 between uniform and segmented states. Such a configuration also tests the alternative  
578 hypothesis that the asymmetry leading to *IF* is due to different response amplitudes for  
579 motion towards and away from the observer. For Experiment 3, we generated such a  
580 display by making the two endpoints of the monocular apparent motion trajectories  
581 straddle zero disparity, which means that the bands alternated between equal and opposite  
582 values of crossed and uncrossed disparity. This subtle manipulation eliminates the  
583 asymmetry associated with alternating between uniform and segmented percepts, but still  
584 gives rise to motion towards and away from the observer in the horizontal anti-phase  
585 conditions, and to left/right or up/down motion in the plane in the in-phase conditions.  
586 The latter point explains why *2F* responses are so similar between Experiments 1 and 3.  
587 The *IF* response is eliminated in Experiment 3, for both horizontal and vertical directions  
588 of motion, tying the response to asymmetric processing of the uniform vs segmented  
589 stimulus states (Figure 6C, H).

590         In the full-cue condition, the *IF* response could in principle arise from either the  
591 CDOT or IOVD cue, as both are present. However, the *IF* response becomes  
592 unmeasurable in the uncorrelated (Figure 6D, I) and anti-correlated (Figure 6E, J)  
593 conditions that eliminate the CDOT cue, indicating that *IF* responses are driven by  
594 CDOT. The fact that this CDOT-driven *IF* response can be measured for vertical relative  
595 disparities suggests that it is not exclusively a MID signal, at least at large disparity  
596 values.

597 Finally, in the case of the infants, a weak, but measurable *IF* response was  
598 present in the referenced horizontal condition (Figure 7, dark green). The sensitivity to  
599 displacement in our full cue display here is similar to previous measurements with  
600 CDOT-isolating dynamic random-dot stereograms (Norcia et al., 2017a). As for adults,  
601 the infant *IF* depends on the presence of the static dot reference and disappears when the  
602 blank reference is used (Figure 7, light green), although caution is needed here given the  
603 weak responses to the full-cue condition.

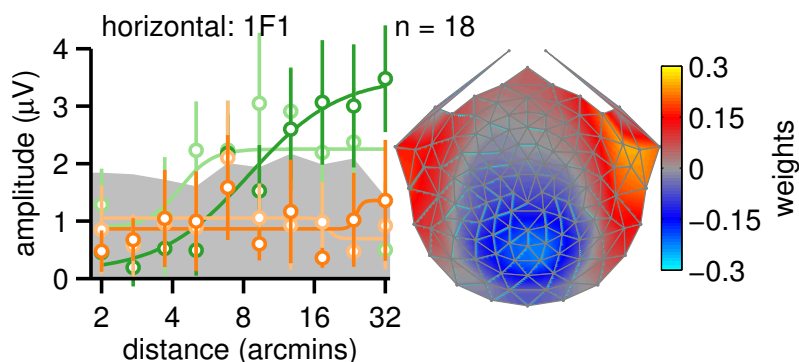

604

605 **Figure 7. Infant 1F SSVEP amplitude vs displacement response functions.** In-phase motion response  
606 functions are shown in dark orange for static reference condition and in light orange for blank reference  
607 conditions. Anti-phase response functions are shown in dark green for the static reference condition and in  
608 light green for the blank reference condition. Smooth curves are fits from a Naka-Rushton function. Error  
609 bars are  $\pm 1$  SEM, and the gray band indicates the average EEG noise level. The response topography is  
610 shown on the right. Unlike previous plots, data are plotted for the fifth reliable component because its  
611 topography was most similar to the topography of the adults. Note that the sign of the weights is arbitrary.  
612

### 613 Discussion

614 Our data provide new insights into the early stages of lateral motion and motion-in-depth  
615 processing. First, for the case of in-phase, lateral motion in the fronto-parallel plane, we  
616 show that both threshold and supra-threshold responsivity is strongly dependent on the  
617 presence of a nearby reference in adults, but not in 5-month-old infants. Infants were not  
618 sensitive to relative motion under the stimulus conditions we used. Single-unit recordings  
619 with large amplitude motions in cat lateral supra-sylvian cortex (von Grunau and Frost,  
620 1983), pigeon tectum (Frost and Nakayama, 1983) and macaque areas MT, MST,  
621 superior colliculus and V1 (Bridgeman, 1972; Allman et al., 1985; Born, 2000; Cao and  
622 Schiller, 2003; Shen et al., 2007) have found cells that respond best when motion in the  
623 classical receptive field is surrounded by differential motion. The pattern of activity we  
624 observe is consistent with relative motion being processed via directionally opponent  
625 interactions between the classical receptive field and its non-classical surround. The lack

626 of reference effects in infants in the present experiments may reflect an immaturity in  
627 these interactions.

628 Our results on anti-phase motion have identified an IOVD-based mechanism that  
629 is present for both horizontal and vertical directions of motion. The functional  
630 manifestations of this mechanism are an elevation of perceptual threshold for anti-phase  
631 motion relative to in-phase motion and a decrease in SSVEP response amplitude.  
632 Amplitude reductions were demonstrable with IOVD-isolating stimuli, linking the  
633 phenomenon to that cue. Because this suppression effect is equal for horizontal and  
634 vertical directions of motion, it is unlikely to be related to the extraction of MID, per se  
635 because stimulus information for MID from IOVD is only present for horizontal or near-  
636 horizontal directions of motion (Lages and Heron, 2010). Prior descriptions of the  
637 phenomenon as reflecting stereoscopic depth movement (Tyler, 1971) thus need to be  
638 revised. The observed suppression either precedes the computation of MID from this cue  
639 or operates in parallel.

640 In our anti-phase conditions, we presented opposite directions of motion to the  
641 two eyes and a differential response between in-phase and anti-phase conditions could  
642 thus only be generated after binocular combination. The anti-phase suppression we have  
643 observed is consistent with a dichoptic, directionally-opponent interaction. The functional  
644 form of the suppressive interaction is a rightward shift of the response curve on the  
645 displacement axis, consistent with a form of divisive normalization (Carandini, 2012).  
646 Prior work has suggested that the perceptual stereo-movement suppression effect is due  
647 to limits in sensitivity imposed by increased noise in binocular differencing operations  
648 (Brooks and Stone, 2004; Katz et al., 2015; Cooper et al., 2016). By using a direct neural  
649 measure over both threshold and supra-threshold levels, we see that the stimulus-driven  
650 population response itself is strongly attenuated. This attenuation is difficult to  
651 accommodate within a probabilistic, noise-limited detection framework. Suppression is  
652 more consistent with mutual inhibition between the two eyes, as initially suggested in the  
653 first observations of the suppression effect (Tyler, 1971).

654 Prior psychophysical work on motion detection thresholds for dichoptic plaids  
655 (Gorea et al., 2001; Maehara et al., 2017) has found evidence for monocular direction  
656 opponency, but not dichoptic opponency. Computational modeling of these results

657 suggested that opponency occurs before divisive gain control operates (Maehara et al.,  
658 2017). Our results thus contrast with these findings in two ways – in the existence of  
659 dichoptic opponency and in how dichoptic sensitivity is being limited. The stimuli used  
660 in the psychophysical experiments were very different than ones used here, consisting of  
661 grating patches drifting at relatively high temporal frequencies (e.g. 7.5 or 20 Hz), that  
662 cannot support image segmentation on the basis of relative motion/disparity cues. Our  
663 stimuli can, and we found that opponent suppression depended strongly on the presence  
664 of a reference. At 5 months of age, we see no evidence of the dichoptic opponent process  
665 we observed for adults. These results, combined with previous results with CDOT-  
666 isolating stimuli (Norcia et al., 2017a), indicate that the binocular cues of IVOD and  
667 CDOT, each capable – in principle – of supporting MID, are both functionally immature.  
668

### 669 **Implications for models of relative motion coding.**

670 Our results suggest several possible extensions to existing models of motion and disparity  
671 processing. Motion responses in V1 have traditionally been modeled with variants of an  
672 energy-like metric (Adelson and Bergen, 1985; van Santen and Sperling, 1985; Watson  
673 and Ahumada, 1985) that were not designed to explain human observers' greatly  
674 enhanced sensitivity to relative motion (Legge and Campbell, 1981; Nakayama and  
675 Tyler, 1981; McKee et al., 1990). Motion energy models could be extended along the  
676 lines of an existing model of relative disparity processing that pools the outputs of  
677 analogous disparity energy detectors in V1 at a second stage (Bredfeldt et al., 2009). The  
678 model combines V1 disparity energy units in an opponent fashion and is successful in  
679 explaining several properties of V2 cell responses to disparity edges. Formulating a  
680 relative motion model along these lines, with motion energy substituted for disparity  
681 energy at the first stage, would certainly be feasible and thus the effects of references in  
682 both motion and disparity domains could be accommodated by an analogous two-stage  
683 model. Existing physiological and fMRI data suggest that both stages are present in V1  
684 for motion (Reppas et al., 1997; Cao and Schiller, 2003; Kohler et al., 2017), but that the  
685 second stage of the relative disparity system begins in V2 or beyond (Peterhans and von  
686 der Heydt, 1993; Thomas et al., 2002; Bredfeldt and Cumming, 2006; Kohler et al.,  
687 2017). Prior data suggest that for both motion (the present results) and disparity (Norcia

688 et al., 2017a) this hypothesized second stage is immature in infants. In the case of motion,  
689 non-classical surround effects (Bridgeman, 1972; Allman et al., 1985; Born, 2000; Cao  
690 and Schiller, 2003; Shen et al., 2007) are viable candidates for an underlying mechanism  
691 for enhanced responses to relative motion. Analogous non-classical surround effects in  
692 the disparity domain have been observed in macaque MT (Bradley and Andersen, 1998)  
693 and MST (Eifuku and Wurtz, 1999). Human fMRI data also provides evidence for  
694 opponency in the disparity domain, starting no later than V3 (Kohler et al., 2017).

695

### 696 **Implications for models of relative disparity coding.**

697 Disparity tuning in macaque V1 is distributed over all orientations and is thus not  
698 specifically associated with horizontal disparities that support stereopsis (Cumming,  
699 2002; Read and Cumming, 2004). Relative disparity tuning in single cells, to our  
700 knowledge, has only been probed with horizontal disparities (Janssen et al., 2001;  
701 Thomas et al., 2002; Umeda et al., 2007; Anzai et al., 2011; Krug and Parker, 2011;  
702 Shiozaki et al., 2012). The present results suggest that sensitivity to relative *vertical*  
703 disparity is present at least for larger disparities presented over a relatively large field-of-  
704 view (up to 20 deg eccentricity). Our neural correlate of relative disparity processing is  
705 the first harmonic response. We showed that the first harmonic arises from CDOT rather  
706 than an IOVD because the response is eliminated in the two stimulus conditions (inter-  
707 ocularly uncorrelated and anti-correlated dots) that remove percepts of MID from CDOT,  
708 but not from IOVD. Functionally, our candidate vertical relative disparity signal is robust  
709 when a reference is present and is eliminated when the reference is removed, as is the  
710 case for horizontal disparity. Further corroboration comes from Experiment 3 where  
711 disparity modulates symmetrically around the reference. This manipulation specifically  
712 varies the relative disparity between the reference and moving bands as well as the global  
713 stimulus configuration. Uniform and segmented states could thus be differentiated based  
714 on the first harmonic signal for both horizontal and vertical stimulus orientations. A  
715 second-stage pooling of vertical absolute disparities could give rise to vertical relative  
716 disparity sensitivity in the same way as has been suggested for horizontal relative  
717 disparity (Bredfeldt et al., 2009). Computationally, this model implements a form of  
718 opponency in the disparity domain, but the opponency is within the classical receptive

719 field of second stage V2 neurons, rather than between classical receptive field and its  
720 surround. Whether vertical relative disparity sensitivity is a property of the classical  
721 receptive field or center-surround interactions remains to be determined.

722 A characteristic behavior that any model of relative disparity processing will need  
723 to account for is the fact that sensitivity is dramatically greater for horizontal compared to  
724 vertical relative disparity by a factor of at least 4 in the adults (Figure 6). Whether the  
725 difference is due to the properties of first-order cells in V1 or whether it represents a  
726 specific adaptation to horizontal disparities in higher visual areas remains to be  
727 determined.

728

### 729 **Implications for models of MID encoding**

730 Different models of MID have compared architectures where disparity is extracted first,  
731 followed by a second stage that computes changes in disparity over time (CDOT) with  
732 architectures where velocity is computed first and then differenced at a second stage  
733 (IOVD; Cumming and Parker, 1994; Peng and Shi, 2010, 2014). We have presented  
734 evidence for each of these processes. The existing models were conceived in the context  
735 of MID from horizontal disparity/motion. Our IOVD correlate, the suppression of the  
736 second harmonic response for anti-phase motion, is present for both horizontal and  
737 vertical displays. The same is true for our CDOT correlate in the first harmonic. Thus,  
738 neither of these visual responses are specific to horizontal motion or a percept of MID.  
739 This suggests that CDOT and IOVD, processed in isolation or combined, are insufficient  
740 to produce a percept of MID. Rather, we have identified what appears to be an  
741 intermediate set of signal processing operations that either occur before MID extraction  
742 or that operate in parallel with it. Moreover, none of the existing models of CDOT or  
743 IOVD take into account the role of references that we show strongly influence the  
744 strength of responses.

745 Which responses in our data are likely to reflect activity specifically related to  
746 MID? Evidence for a MID signal based on CDOT comes from our finding that disparity  
747 thresholds for the CDOT-specific response at the first harmonic is much lower for  
748 horizontal than for vertical conditions, consistent with the prominent role that horizontal  
749 relative disparity plays in perception. We see very little evidence for an asymmetry



750 between horizontal and vertical conditions at the second harmonic, our IOVD correlate.  
751 We do, however see a measurable superiority of responsiveness to smaller horizontal  
752 displacements at the fourth harmonic that persists for stimuli that isolate the IOVD cue.  
753 The fact that the fourth harmonic – but not the second harmonic – is tuned for stimulus  
754 orientation indicates that the two harmonics are not being generated by a common,  
755 higher-order non-linearity, such as rectification in a population of transient or direction-  
756 selective cells. An alternative view that is qualitatively consistent with velocity-first MID  
757 models is a cascade model in which a first stage motion computation creates second  
758 harmonics at its output that are then pooled in a non-linear fashion by a binocular MID  
759 process, with the result being a response that is fourth order with respect to the input. In  
760 this model, the second harmonic would have to be monocular for the fourth harmonic to  
761 represent the output of the binocular MID stage. However, the second harmonic is  
762 modulated by inter-ocular phase and is thus at least partly due to binocular mechanisms.  
763 This suggests that MID and anti-phase suppression may arise in parallel pathways, rather  
764 than being properties of a common MID mechanism.

765

#### 766 **Implications for models of human visual development.**

767 The visual evoked responses of 5-month-old infants in the presence of high-quality  
768 motion and disparity references bear a strong resemblance to the unreferenced responses  
769 of adults, suggesting that both relative motion and relative disparity mechanisms are  
770 selectively immature in infants. Relative motion sensitivity is quantitatively immature,  
771 being ~8 times lower than that of the adult (compare Figure 4 to Figure 3A). The present  
772 results showing immature relative disparity mechanisms at this age are consistent with  
773 our previous results from CDOT-isolating dynamic random dot stereograms (Norcia et  
774 al., 2017a).

775 In addition to their lack of a sensitivity to references, infants also show a lack of  
776 anti-phase suppression. Because anti-phase suppression in adults is strongly dependent on  
777 the presence of references, it is conceivable that the lack of anti-phase suppression in  
778 infants is driven by their lack of sensitivity to references. However, it is also possible that  
779 the lack of anti-phase suppression represents a separate immaturity relating to binocular  
780 vision. In-phase motion responses were measured under binocular conditions, but would

781 likely be very similar if presented under monocular viewing conditions. Thus, sensitivity  
782 to references is not inherently a binocular phenomenon, whereas anti-phase suppression  
783 is. The infant visual system thus displays qualitative immaturities and not just  
784 quantitative differences in its sensitivity to displacement.

785

## 786 **Materials and Methods**

787 **Participants and Procedure.** A total of 59 adults participated in one or more of the  
788 experiments (age range 17.1 to 40.8 years; mean 23.2, SD = 5.24). Twenty-two healthy  
789 full-term infants with birthweights exceeding 2500g participated (12 male, avg. age = 5.6  
790 months, SD = 1.1). The adults had normal or corrected-to-normal vision, with a visual  
791 acuity of 0.1 LogMar in each eye or better and no significant difference of performance  
792 between both eyes. Adult participants also scored at least 40 arcsec or better on the  
793 RanDot Stereogram test. Prior to the experiment, the procedure was explained to each  
794 participant or the parent, and written informed consent was obtained before the  
795 experiment began. The protocol was approved by the Stanford University Institutional  
796 Review Board. Adult participants were solicited through Stanford University subject  
797 pools. Infants were recruited via mailers sent to addresses procured by the California  
798 Department of Public Health, Center for Health Statistics and Informatics.

799

800 **Stimuli.** In all experiments, participants viewed Random Dot Kinematograms (RDK) or  
801 stereograms (RDS) on a 65-inch Sony Bravia XBR-65HX929 LCD monitor. The dots  
802 were drawn with OpenGL using antialiasing at a screen resolution of  $1920 \times 1080$  pixels.  
803 This function allowed us to present disparities via dithering that were smaller than the  
804 nominal resolution set by the  $1920 \times 1080$  display matrix. This was verified by  
805 examining the contents of video memory and through examination of the anti-aliased  
806 pixels under magnification. The dots were updated at 20 Hz.

807 For 7 of 8 experiments, viewing distance was set at 1 m, resulting in a  $40 \times 40$  deg  
808 field of view, a 4.5 arcmin dot diameter, with 5 dots per square degree. In the first  
809 psychophysics experiment, the viewing distance was set at 3 m, to allow for smaller  
810 increments in dot locations. The stimuli were rendered as Red/Blue anaglyphs. The  
811 luminance of the images in the two eyes was equated by calibrating the display through

812 each filter. A -0.5 diopter lens was placed in the Blue channel of the adult glasses to  
813 compensate for the differential focus caused by chromatic aberration. Cross-talk was  
814 minimal perceptually when viewing high-contrast images in the two eyes.

815

816 **Experimental design and procedure.** Schematic illustrations of the stimuli are provided  
817 in Figure 1. The displays in each Experiment comprised a set of alternating bands  
818 containing random dots that could differ in their inter-ocular correlation, temporal  
819 coherence or both. One set of “test bands” underwent in-phase or anti-phase motion on  
820 each trial, with the adjacent “reference bands” serving as a static or dynamic reference.  
821 There were 20 test bands and 20 reference bands on the screen (spatial frequency of  
822  $\sim 0.45$  c/deg). When the inter-ocular correlation was 100%, there were matching dots in  
823 each eye, when it was 0%, independently generated dots were presented to each eye.  
824 When the inter-ocular correlation was -100%, the dark dots in one eye were matched with  
825 bright dots in the other eye (see Experiment 5 for further details). Displays in which the  
826 temporal correlation was 100% had dots that moved coherently with unlimited lifetime.  
827 Displays that had a temporal coherence of 0% had newly generated dots on every image  
828 update (20 Hz). Dots were replotted at the end of motion trajectory to keep the number of  
829 dots on the screen the same at all times and the location of the borders of the dot region  
830 constant.

831 Experiments 1, 2, and 3 used a  $2 \times 2 \times 2$  design, with factors of inter-ocular  
832 phase, reference quality and stimulus orientation, resulting in 8 conditions. Inter-ocular  
833 phase of the moving test bands was either in-phase or in anti-phase, *e.g.* either a 0 or 180  
834 deg temporal phase relationship applied between eyes. Manipulation of the dots in the  
835 reference region created referenced and unreferenced motion and disparity conditions. In  
836 Experiments 4 and 5, manipulation of the inter-ocular correlation in the moving bands  
837 (changing them from 100% correlated between eyes to either 0% or -100%) was used to  
838 isolate the IOVD cue. Here the design was also  $2 \times 2 \times 2$  with factors of inter-ocular  
839 phase, inter-ocular correlation and orientation. In each of the adult experiments,  
840 participants completed 15 trials per stimulus condition, and the 8 conditions were run in a  
841 block-randomized fashion: 5 consecutive trials of a given condition comprised a block.  
842 Data were collected in 3 separate, continuous recording sessions, each lasting

843 approximately 8 minutes, with a break given in between. During each session, a single  
844 block of each condition was run. Observers were instructed to fixate the center of the  
845 display and to withhold blinks. For the infant experiment, only the four horizontal  
846 conditions were used, resulting in a  $2 \times 2$  design, with factors of inter-ocular phase and  
847 reference quality. Infants completed 10 trials. Details of each experiment are provided  
848 below.

849

850 *Experiment 1: Near vs Zero, absolute motion with noise reference*

851 Twelve adults (5 male) with an average age of 22.2 years (SD = 4.97) participated.  
852 Participants viewed horizontal and vertical stimulus orientations at 1 meter that were  
853 either in-phase (2D motion) or anti-phase. For the horizontal orientation, the anti-phase  
854 condition created crossed disparities in the test bands that alternated with zero disparity at  
855 2 Hz. Zero disparity was at the plane of the display. Stimulus displacement in each eye  
856 swept from 0.5 to 16 arcmin in 10 equal log steps, which were updated at 1 second  
857 intervals. Trials lasted 12 seconds, with the first and last step being repeated at the  
858 beginning and end of each trial, respectively. This was done to minimize effects of  
859 contrast transients when the dots first appeared, and to ensure that participants did not  
860 blink during the middle 10 sec of each trial, which went into the data analysis. All  
861 displacements are plotted as the single-eye displacement value. The displacement was  
862 modulated with a square wave temporal profile. The reference bands were static in the  
863 relative motion conditions, and contained incoherent, uncorrelated motion in the absolute  
864 motion conditions.

865

866 *Experiment 2: Near vs Zero, absolute motion with blank reference*

867 Thirteen adults (6 male, avg. age = 22.9 years, SD = 4.92) participated. Blank reference  
868 bands (dark empty regions with no dots) replaced incoherent motion reference bands for  
869 the absolute motion conditions. All other stimulus features from Experiment 1 were kept  
870 constant.

871

872 *Experiment 3: Near vs Far, absolute motion with noise reference*

873 Twelve adults (7 male, avg. age=22.1 years, SD=5.08) participated. The end-points of the  
874 motion trajectories were set so that for the anti-phase horizontal displacement conditions,  
875 the disparity alternated between equal crossed and uncrossed values about zero disparity.  
876 The magnitude of peak to peak-disparity in the test bands matched that of all other  
877 experiments, only the disparity of the test bands relative to that of the reference bands  
878 was changed. Absolute motion conditions presented incoherent motion in the reference  
879 bands, as in Experiment 1.

880

881 *Experiment 4: Uncorrelated test: IOVD isolation*

882 Thirteen adults (6 male, avg. age = 24.6 years, SD = 5.14) participated. The relative  
883 motion and relative disparity conditions were the same as in Experiment 1, but the  
884 absolute motion conditions were replaced with conditions in which moving test bands  
885 contained uncorrelated dots while reference bands contained static dots.

886

887 *Experiment 5: Anti-correlated test: IOVD isolation*

888 Thirteen adults (7 male, avg. age = 27.3 years, SD = 6.9) participated. The relative  
889 motion and relative disparity conditions were similar to those used in Experiment 1, but  
890 the absolute motion conditions were replaced with conditions in which moving test bands  
891 contained anti-correlated dots while reference bands contained static dots. In all  
892 conditions, dots were presented on a mean-luminance purple background, which allowed  
893 bright and dark dots for both red and blue color channels to be shown to either eye in the  
894 anti-correlated display.

895

896 *Psychophysics Experiment 1 with relative displacement conditions*

897 Fourteen adults (7 male, avg. age = 25.8 years, SD = 5.87) participated. Viewing distance  
898 was set at 3m rather than the 1m used for all other experiments to allow for smaller  
899 displacement increments. Spatial frequency of the static and reference bands was adjusted  
900 to 0.46 cpd and dot diameter to 4.2 arcmin to match these parameters with those used at  
901 1m. Displacements ranged from 0.16 to 2.56 arcmin in 10 equal log steps. Parameters  
902 were otherwise matched to the relative conditions of Experiments 1 and 2, with static  
903 reference bands. On each trial, participants viewed either an ascending or descending

904 sweep for a given condition and were instructed to press the right arrow key on a  
905 keyboard button whenever they detected a state change in the stimuli. For ascending  
906 sweeps, participants pressed the key when they first perceived the dots to change from  
907 static to moving. For descending sweeps, participants pressed the key when they  
908 perceived the moving dots changed to static. Data from 2 participants were excluded  
909 from analysis because they failed to respond or responded incorrectly in more than 15%  
910 of trials.

911

### 912 *Psychophysics Experiment 2 with absolute conditions*

913 Eleven adults (6 male, avg. age = 24.8 years, SD = 5.9) participated. 5 participants (3  
914 male, avg. age = 29.1, SD = 4.6) took part in both psychophysics experiments. The  
915 display parameters matched the absolute conditions of Experiment 2, with blank  
916 reference bands, except that participants were shown both ascending and descending  
917 sweeps. Participants completed the same behavioral measure as described for  
918 Psychophysics Experiment 1. We also included infrequent catch trials for ascending and  
919 descending conditions, in which the state of motion never changed, i.e. the dots remained  
920 static or moving for the duration of the trial. Participants were shown these types of catch  
921 trials and understood there should be no response when encountered during the recording  
922 session. Catch trials were excluded from the analysis. Data from 1 participant were  
923 excluded from analysis because they failed to respond or responded incorrectly in more  
924 than 15% of trials.

925

### 926 *Infant Experiment*

927 Infants completed a two-part, reduced protocol that consisted of the four horizontal  
928 conditions from Experiment 2, but with a displacement range of 2-32 arcmin. The  
929 adjusted sweep was used to compensate for the infants' elevated displacement threshold  
930 (Norcia et al., 2017b). Infants viewed the horizontal relative motion conditions (in-phase  
931 and anti-phase) and blank reference absolute motion conditions (in-phase and anti-phase)  
932 during separate visits. Condition order was counterbalanced for session one and two. Out  
933 of 22 infants, 4 were excluded from the analysis because they were unable to complete at  
934 least 5 trials of each condition. Sixteen infants (7 male, avg. age = 5.3 months, SD =

935 0.84) completed both the relative motion and absolute motion session, while another 2  
936 completed only the absolute motion session, for a total of 18 infant datasets (8 male, avg.  
937 age =5.32 months, SD = 0.80).

938

939 **EEG Acquisition and Processing.** Data were collected from all participants using high-  
940 density HydroCell electrode arrays paired with an Electrical Geodesics NetAmp400 and  
941 accompanying NetStation 5 software. The nets used for adults had 128 channel and the  
942 one used for infants had 124. EEG data initially sampled at 500 Hz was resampled at 420  
943 Hz to provide 7 samples per video frame. Digital triggers were sent from in-house  
944 stimulus presentation software and stored with the EEG recording to allow synching of  
945 the visual stimulus and EEG with millisecond precision. Recordings were exported from  
946 NetStation using a 0.3-50 Hz bandpass filter, which was applied twice to ensure that  
947 power in frequencies outside the filter range was eliminated. The data were then imported  
948 into in-house signal processing software for preprocessing. If more than 15% of samples  
949 for a given sensor exceeded an amplitude threshold, the sensor was excluded from further  
950 analysis. Adult data were evaluated using a 30  $\mu$ V threshold, whereas a more liberal  
951 threshold was applied for the infant data, ranging between 30 and 100  $\mu$ V. Sensors that  
952 were noisier than the threshold were replaced by an averaged value from six of their  
953 nearest neighbors. The EEG data was then re-referenced to the common average of all the  
954 sensors and segmented into ten 1000 ms long epochs (each corresponding to exactly 2  
955 stimulus cycles). Epochs for which more than 10% of data samples exceeded a noise  
956 threshold (30  $\mu$ V for both adult and infant participants) or for which any sample exceeded  
957 a peak/blink threshold (60  $\mu$ V for both adult and infant participants) were excluded from  
958 the analysis on a sensor-by-sensor basis. If more than 7 sensors had epochs that exceeded  
959 the peak/blink threshold, the entire epoch was rejected for all channels. This was  
960 typically the case for epochs containing artifacts, such as blinks or eye movements.

961

962 **Data Analysis.** In our sweep paradigm, stimulus values were updated for every 1-sec bin,  
963 so each epoch in our analysis is tied to a distinct set of stimulus parameters, for a given  
964 trial. The amplitude and phase of the Steady-State Visual Evoked Potentials (SSVEPs)  
965 were extracted using a Recursive Least Squares adaptive filter (Tang and Norcia, 1995)

966 with a memory length equal to the 1 sec bin length. Real and imaginary components of  
967 the SSVEPs at the first four harmonics of the stimulus frequency were calculated. Noise  
968 estimates were calculated at neighboring frequency bins, i.e.  $F \pm 1$  Hz.

969 We reduced the spatial dimensionality of our data by decomposing the sensor data  
970 into a set of physiologically interpretable components using Reliable Components  
971 Analysis (RCA; Dmochowski et al., 2015). Because SSVEP response phase is constant  
972 over repeated trials of the same stimulus, RCA utilizes a cross-trial covariance matrix to  
973 decompose the 128-channel montage into a smaller number of components that maximize  
974 trial-to-trial consistency through solving for a generalized eigenvalue problem. The real  
975 and imaginary values for each 1 sec epoch, across the 128 sensors, and across trials and  
976 participants, served as the input data for RCA. Reliable components were derived  
977 separately for each harmonic in each of the five main experiments, and separately for  
978 each harmonic in the infant experiment. The data reduction for the SSVEP data collected  
979 during the psychophysical experiments was done by projecting the data through the  
980 component weights from the first RC derived for  $2F$  in Experiment 2, which used the  
981 same stimulus parameters as the psychophysical experiments.

982 We ran two additional reliable components analyses combining data from unique  
983 participants across several experiments. One exclusively with data from the static  
984 reference horizontal and vertical anti-phase conditions from Experiments 1, 2, 3 and 4,  
985 yielding a data set with 39 unique participants, and another with data from the horizontal  
986 and vertical anti-phase conditions in the uncorrelated and anti-correlated IOVD-isolating  
987 Experiments 4 and 5, yielding a data set with 22 unique participants. In both cases, we  
988 derived reliable components separately for the  $2F$  and  $4F$  data, using the same RCA  
989 approach as for the individual experiments.

990 Our analyses focused on the first RC component, which for  $2F$  data explained  
991 much of the reliability in the 5 main experiments (average = 67.8%, SD = 3.1) and a  
992 substantial amount of the variance (average = 23.1% SD = 1.2). This was also the case  
993 for  $1F$  for 4 out of 5 experiments, excluding Experiment 3 where  $1F$  were not measurable  
994 (average reliability explained average = 49.3% SD = 3.9; average variance explained =  
995 18.6% SD = 3.5). For the infant  $1F$  data, the first RC did not look like a visual response,  
996 likely because SSVEPs were weak overall. We did however see a topography and



997 response function that resembled that observed for adults in RC5, which we present in  
998 Figure 7.

999         After projecting the epoch-level data through the RCA component weights,  
1000 averages across trials in each condition and across participants were computed by  
1001 averaging the real and imaginary coefficients for a given response harmonic (vector  
1002 average responses). The averages were computed separately for each of the 10 bins in the  
1003 displacement sweeps. Noise estimates based on neighboring frequency bins did not  
1004 contribute to RCA but were projected through the component weights to allow  
1005 comparison with the SSVEP data, and then averaged across trials, participants and  
1006 conditions.

1007         We fit the vector-averaged response functions with the following equation (Naka-  
1008 Rushton function) (Naka and Rushton, 1966).

1009 
$$R = R_{max} \left( \frac{d^n}{d^n + d_{50}^n} \right) + b$$

1010 Where  $R$  is the response,  $d$  is the displacement of the moving bands, and  $b$  is the baseline.  
1011  $R_{max}$  (maximal response),  $n$  (exponent of the power function,  $> 0$ ),  $b$  and  $d_{50}$   
1012 (displacement at half  $R_{max}$ ) are free parameters. We computed standard errors for each  
1013 parameter based on a jackknife procedure in which the function was fitted to average data  
1014 from all participants except one (Equation 2; Miller et al., 2009). We tested whether the  
1015 fit parameters were significantly different across conditions by computing  $t$ -values based  
1016 on the jackknifed standard error of the difference (Equations 2 and 3; Miller et al., 1998).

1017

## 1018 **Acknowledgements**

1019 This research was supported by National Institutes of Health grant EY018775.

1020

1021

1022

1023

1024

1025

1026

1027

## References

1028

- 1029 Adelson EH, Bergen JR (1985) Spatiotemporal energy models for the perception of  
1030 motion. *J Opt Soc Am A* 2:284-299.
- 1031 Allman J, Miezin F, McGuinness E (1985) Direction- and velocity-specific responses  
1032 from beyond the classical receptive field in the middle temporal visual area (MT).  
1033 *Perception* 14:105-126.
- 1034 Anzai A, Chowdhury SA, DeAngelis GC (2011) Coding of Stereoscopic Depth  
1035 Information in Visual Areas V3 and V3A. *The Journal of Neuroscience* 31:10270-  
1036 10282.
- 1037 Bakin JS, Nakayama K, Gilbert CD (2000) Visual responses in monkey areas V1 and V2  
1038 to three-dimensional surface configurations. *The Journal of neuroscience : the*  
1039 *official journal of the Society for Neuroscience* 20:8188-8198.
- 1040 Beverley KI, Regan D (1973) Evidence for the existence of neural mechanisms  
1041 selectively sensitive to the direction of movement in space. *The Journal of*  
1042 *physiology* 235:17-29.
- 1043 Born RT (2000) Center-surround interactions in the middle temporal visual area of the  
1044 owl monkey. *J Neurophysiol* 84:2658-2669.
- 1045 Bradley DC, Andersen RA (1998) Center-surround antagonism based on disparity in  
1046 primate area MT. *J Neurosci* 18:7552-7565.
- 1047 Bredfeldt CE, Cumming BG (2006) A simple account of cyclopean edge responses in  
1048 macaque v2. *J Neurosci* 26:7581-7596.
- 1049 Bredfeldt CE, Read JC, Cumming BG (2009) A quantitative explanation of responses to  
1050 disparity-defined edges in macaque V2. *J Neurophysiol* 101:701-713.
- 1051 Bridgeman B (1972) Visual receptive fields sensitive to absolute and relative motion  
1052 during tracking. *Science (New York, NY)* 178:1106-1108.
- 1053 Brooks KR, Stone LS (2004) Stereomotion speed perception: Contributions from both  
1054 changing disparity and interocular velocity difference over a range of relative  
1055 disparities. *Journal of vision* 4:6-6.
- 1056 Brooks KR, Stone LS (2006) Stereomotion suppression and the perception of speed:  
1057 accuracy and precision as a function of 3D trajectory. *Journal of vision [electronic*  
1058 *resource]* 6:1214-1223.
- 1059 Cao A, Schiller PH (2003) Neural responses to relative speed in the primary visual cortex  
1060 of rhesus monkey. *Visual neuroscience* 20:77-84.
- 1061 Carandini M (2012) From circuits to behavior: a bridge too far? *Nature neuroscience*  
1062 15:507-509.
- 1063 Cooper EA, van Ginkel M, Rokers B (2016) Sensitivity and bias in the discrimination of  
1064 two-dimensional and three-dimensional motion direction. *Journal of vision*  
1065 *[electronic resource]* 16:5.
- 1066 Cormack LK, Czuba TB, Knoll J, Huk AC (2017) Binocular Mechanisms of 3D Motion  
1067 Processing. *Annu Rev Vis Sci* 3:297-318.
- 1068 Cottareau BR, McKee SP, Norcia AM (2014) Dynamics and cortical distribution of  
1069 neural responses to 2D and 3D motion in human. *J Neurophysiol* 111:533-543.
- 1070 Cumming BG (2002) An unexpected specialization for horizontal disparity in primate  
1071 primary visual cortex. *Nature* 418:633-636.

- 1072 Cumming BG, Parker AJ (1994) Binocular mechanisms for detecting motion-in-depth.  
1073 Vision research 34:483-495.
- 1074 Cumming BG, Parker AJ (1997) Responses of primary visual cortical neurons to  
1075 binocular disparity without depth perception. Nature 389:280-283.
- 1076 Cumming BG, Parker AJ (1999) Binocular neurons in V1 of awake monkeys are  
1077 selective for absolute, not relative, disparity. J Neurosci 19:5602-5618.
- 1078 Cumming BG, Parker AJ (2000) Local disparity not perceived depth is signaled by  
1079 binocular neurons in cortical area V1 of the Macaque. J Neurosci 20:4758-4767.
- 1080 Czuba TB, Rokors B, Huk AC, Cormack LK (2010) Speed and eccentricity tuning reveal  
1081 a central role for the velocity-based cue to 3D visual motion. J Neurophysiol  
1082 104:2886-2899.
- 1083 Dmochowski JP, Greaves AS, Norcia AM (2015) Maximally reliable spatial filtering of  
1084 steady state visual evoked potentials. NeuroImage 109:63-72.
- 1085 Dow BM (1974) Functional classes of cells and their laminar distribution in monkey  
1086 visual cortex. J Neurophysiol 37:927-946.
- 1087 Dubner R, Zeki SM (1971) Response properties and receptive fields of cells in an  
1088 anatomically defined region of the superior temporal sulcus in the monkey. Brain  
1089 research 35:528-532.
- 1090 Eifuku S, Wurtz RH (1999) Response to motion in extrastriate area MSTl: disparity  
1091 sensitivity. J Neurophysiol 82:2462-2475.
- 1092 Frost BJ, Nakayama K (1983) Single visual neurons code opposing motion independent  
1093 of direction. Science (New York, NY 220:744-745.
- 1094 Glennerster A, McKee SP (1999) Bias and sensitivity of stereo judgements in the  
1095 presence of a slanted reference plane. Vision research 39:3057-3069.
- 1096 Glennerster A, McKee SP, Birch MD (2002) Evidence for surface-based processing of  
1097 binocular disparity. Curr Biol 12:825-828.
- 1098 Gorea A, Conway TE, Blake R (2001) Interocular interactions reveal the opponent  
1099 structure of motion mechanisms. Vision research 41:441-448.
- 1100 Harris JM, Nefs HT, Grafton CE (2008) Binocular vision and motion-in-depth. Spatial  
1101 vision 21:531-547.
- 1102 Hubel DH, Wiesel TN (1968) Receptive fields and functional architecture of monkey  
1103 striate cortex. The Journal of physiology 195:215-243.
- 1104 Janssen P, Vogels R, Liu Y, Orban GA (2001) Macaque inferior temporal neurons are  
1105 selective for three-dimensional boundaries and surfaces. J Neurosci 21:9419-  
1106 9429.
- 1107 Katz LN, Hennig JA, Cormack LK, Huk AC (2015) A Distinct Mechanism of Temporal  
1108 Integration for Motion through Depth. The Journal of Neuroscience 35:10212-  
1109 10216.
- 1110 Kohler PJ, Cottureau B, Norcia AM (2017) Image segmentation based on relative motion  
1111 and relative disparity cues in topographically organized areas of human visual  
1112 cortex. bioRxiv.
- 1113 Krug K, Parker AJ (2011) Neurons in dorsal visual area V5/MT signal relative disparity.  
1114 J Neurosci 31:17892-17904.
- 1115 Lages M, Heron S (2010) On the inverse problem of binocular 3D motion perception.  
1116 PLoS Comput Biol 6:e1000999.

- 1117 Legge GE, Campbell FW (1981) Displacement detection in human vision. *Vision*  
1118 *research* 21:205-213.
- 1119 Maeda M, Sato M, Ohmura T, Miyazaki Y, Wang AH, Awaya S (1999) Binocular depth-  
1120 from-motion in infantile and late-onset esotropia patients with poor stereopsis.  
1121 *Investigative ophthalmology & visual science* 40:3031-3036.
- 1122 Maehara G, Hess RF, Georgeson MA (2017) Direction discrimination thresholds in  
1123 binocular, monocular, and dichoptic viewing: Motion opponency and contrast  
1124 gain control. *Journal of vision [electronic resource]* 17:7.
- 1125 Maunsell JH, Van Essen DC (1983) Functional properties of neurons in middle temporal  
1126 visual area of the macaque monkey. I. Selectivity for stimulus direction, speed,  
1127 and orientation. *J Neurophysiol* 49:1127-1147.
- 1128 McKee SP, Welch L, Taylor DG, Bowne SF (1990) Finding the common bond:  
1129 stereoacuity and the other hyperacuties. *Vision research* 30:879-891.
- 1130 Mikami A, Newsome WT, Wurtz RH (1986) Motion selectivity in macaque visual  
1131 cortex. II. Spatiotemporal range of directional interactions in MT and V1. *J*  
1132 *Neurophysiol* 55:1328-1339.
- 1133 Miller J, Patterson T, Ulrich R (1998) Jackknife-based method for measuring LRP onset  
1134 latency differences. *Psychophysiology* 35:99-115.
- 1135 Miller J, Ulrich R, Schwarz W (2009) Why jackknifing yields good latency estimates.  
1136 *Psychophysiology* 46:300-312.
- 1137 Naka KI, Rushton WAH (1966) S-potentials from luminosity units in the retina of fish  
1138 (Cyprinidae). *The Journal of Physiology* 185:587-599.
- 1139 Nakayama K, Tyler CW (1981) Psychophysical isolation of movement sensitivity by  
1140 removal of familiar position cues. *Vision research* 21:427-433.
- 1141 Nefs HT, Harris JM (2010) What visual information is used for stereoscopic depth  
1142 displacement discrimination? *Perception* 39:727-744.
- 1143 Norcia AM, Gerhard HE, Meredith WJ (2017a) Development of Relative Disparity  
1144 Sensitivity in Human Visual Cortex. *J Neurosci* 37:5608-5619.
- 1145 Norcia AM, Pei F, Kohler PJ (2017b) Evidence for long-range spatiotemporal  
1146 interactions in infant and adult visual cortex. *Journal of vision* 17:12-12.
- 1147 Orban GA, Kennedy H, Bullier J (1986) Velocity sensitivity and direction selectivity of  
1148 neurons in areas V1 and V2 of the monkey: influence of eccentricity. *J*  
1149 *Neurophysiol* 56:462-480.
- 1150 Peng Q, Shi BE (2010) The changing disparity energy model. *Vision research* 50:181-  
1151 192.
- 1152 Peng Q, Shi BE (2014) Neural population models for perception of motion in depth.  
1153 *Vision research* 101:11-31.
- 1154 Peterhans E, von der Heydt R (1993) Functional organization of area V2 in the alert  
1155 macaque. *The European journal of neuroscience* 5:509-524.
- 1156 Petrov Y, Glennerster A (2004) The role of a local reference in stereoscopic detection of  
1157 depth relief. *Vision research* 44:367-376.
- 1158 Petrov Y, Glennerster A (2006) Disparity with respect to a local reference plane as a  
1159 dominant cue for stereoscopic depth relief. *Vision research* 46:4321-4332.
- 1160 Poggio GF, Gonzalez F, Krause F (1988) Stereoscopic mechanisms in monkey visual  
1161 cortex: binocular correlation and disparity selectivity. *J Neurosci* 8:4531-4550.

- 1162 Poggio GF, Motter BC, Squatrito S, Trotter Y (1985) Responses of neurons in visual  
1163 cortex (V1 and V2) of the alert macaque to dynamic random-dot stereograms.  
1164 *Vision research* 25:397-406.
- 1165 Read JC, Cumming BG (2004) Understanding the cortical specialization for horizontal  
1166 disparity. *Neural Comput* 16:1983-2020.
- 1167 Reppas JB, Niyogi S, Dale AM, Sereno MI, Tootell RB (1997) Representation of motion  
1168 boundaries in retinotopic human visual cortical areas. *Nature* 388:175-179.
- 1169 Rokers B, Cormack LK, Huk AC (2008) Strong percepts of motion through depth  
1170 without strong percepts of position in depth. *Journal of vision [electronic  
1171 resource]* 8:6 1-10.
- 1172 Rokers B, Cormack LK, Huk AC (2009) Disparity- and velocity-based signals for three-  
1173 dimensional motion perception in human MT+. *Nature neuroscience* 12:1050-  
1174 1055.
- 1175 Samonds JM, Tyler CW, Lee TS (2017) Evidence of Stereoscopic Surface  
1176 Disambiguation in the Responses of V1 Neurons. *Cereb Cortex* 27:2260-2275.
- 1177 Schiller PH, Finlay BL, Volman SF (1976) Quantitative studies of single-cell properties  
1178 in monkey striate cortex. I. Spatiotemporal organization of receptive fields. *J  
1179 Neurophysiol* 39:1288-1319.
- 1180 Serrano-Pedraza I, Phillipson GP, Read JC (2010) A specialization for vertical disparity  
1181 discontinuities. *Journal of vision [electronic resource]* 10:2 1-25.
- 1182 Shen ZM, Xu WF, Li CY (2007) Cue-invariant detection of centre-surround discontinuity  
1183 by V1 neurons in awake macaque monkey. *The Journal of physiology* 583:581-  
1184 592.
- 1185 Shioiri S, Saisho H, Yaguchi H (2000) Motion in depth based on inter-ocular velocity  
1186 differences. *Vision research* 40:2565-2572.
- 1187 Shiozaki HM, Tanabe S, Doi T, Fujita I (2012) Neural Activity in Cortical Area V4  
1188 Underlies Fine Disparity Discrimination. *The Journal of Neuroscience* 32:3830-  
1189 3841.
- 1190 Tang Y, Norcia AM (1995) An adaptive filter for steady-state evoked responses.  
1191 *Electroencephalography and clinical neurophysiology* 96:268-277.
- 1192 Thomas OM, Cumming BG, Parker AJ (2002) A specialization for relative disparity in  
1193 V2. *Nature neuroscience* 5:472-478.
- 1194 Tyler CW (1971) Stereoscopic depth movement: two eyes less sensitive than one.  
1195 *Science (New York, NY)* 174:958-961.
- 1196 Umeda K, Tanabe S, Fujita I (2007) Representation of Stereoscopic Depth Based on  
1197 Relative Disparity in Macaque Area V4. *Journal of neurophysiology* 98:241-252.
- 1198 van Santen JP, Sperling G (1985) Elaborated Reichardt detectors. *J Opt Soc Am A* 2:300-  
1199 321.
- 1200 von Grunau M, Frost BJ (1983) Double-opponent-process mechanism underlying RF-  
1201 structure of directionally specific cells of cat lateral suprasylvian visual area.  
1202 *Experimental brain research Experimentelle Hirnforschung* 49:84-92.
- 1203 Watson AB, Ahumada AJ, Jr. (1985) Model of human visual-motion sensing. *J Opt Soc  
1204 Am A* 2:322-341.
- 1205 Westheimer G, McKee SP (1979) What prior uniocular processing is necessary for  
1206 stereopsis? *Investigative ophthalmology & visual science* 18:614-621.
- 1207
